# Supplementary material
Source: publisher site journal article supplement (https://www.spandidos-publications.com/3257/downloadSupplementary)

Figure S1. Expression of miRNAs in healthy and GC tissues. miRNA expression level in GC tissues and the control group determined by reverse transcription-quantitative PCR. \*P<0.05. miRNA/miR, microRNA; GC, gastric cancer.

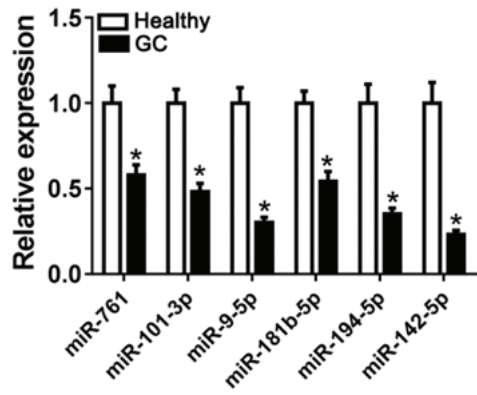

Figure S2. Expression of miR-142-5p and JAG1 in gastric cancer cells. Transfection efficiency of (A) miR-142-5p inhibitor/mimic and (B) overexpression vector of JAG1 determined by reverse transcription-quantitative PCR in AGS and MKN-45 cells. \*P<0.05. miR, microRNA; NC, negative control; in, inhibitor; JAG1, jagged1.

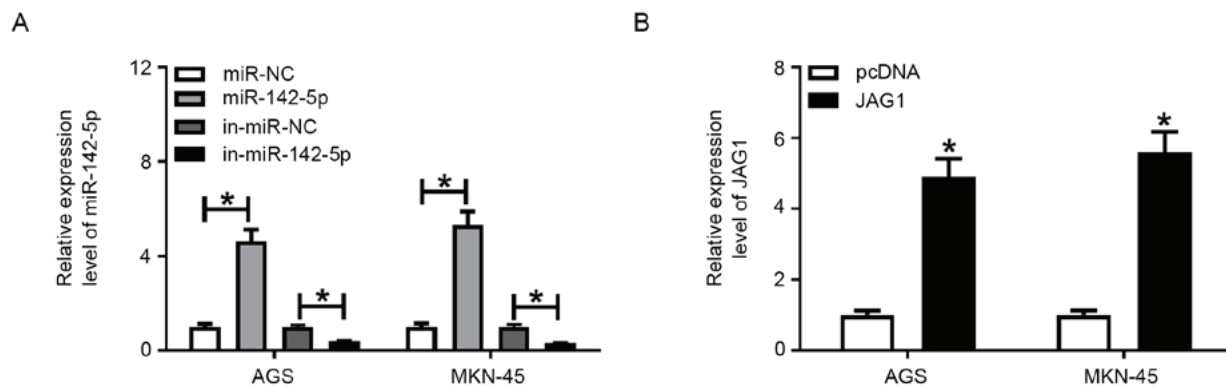

Supplement: Supplementary file 1 [file downloadSupplementary]
